# Supplementary material for: B-site substitution effects on the mechanical properties of halide perovskites [C4H12N2][BCl3]·H2O (B = NH4+; K+)
Source: Royal Society of Chemistry journal article supplement (doi:10.1039/d4dt01795a), 2024-01-01
Supplement: d4dt01795a1.pdf [file d4dt01795a1.pdf]

## Electronic Supplementary Information

B-Site Substitution Effect on the Mechanical Properties of Halide  
Perovskites  $[\text{C}_4\text{H}_{12}\text{N}_2][\text{BCl}_3]\cdot\text{H}_2\text{O}$  ( $\text{B} = \text{NH}_4^+$ ;  $\text{K}^+$ )

Kai Li<sup>a,\*</sup>, Zhi-Gang Li<sup>b</sup>, Yong-Qiang Chen<sup>a,\*</sup>, and Wei Li<sup>b</sup>

<sup>a</sup>*Department of Chemistry and Chemical Engineering, Jinzhong University, Jinzhong, Shanxi 030619, China*

<sup>b</sup>*School of Materials Science and Engineering, Smart Sensing Interdisciplinary Science Center, Nankai University & TKL of Metal and Molecule Based Material Chemistry, Tianjin 300350, China*

Table S1 Comparison of cell parameters of PIP-NH<sub>4</sub> and PIP-K.

| Compound                                                                 | [C <sub>4</sub> H <sub>12</sub> N <sub>2</sub> ][NH <sub>4</sub> Cl <sub>3</sub> ]·H <sub>2</sub> O <sup>#</sup> | [C <sub>4</sub> H <sub>12</sub> N <sub>2</sub> ][KCl <sub>3</sub> ]·H <sub>2</sub> O |
|--------------------------------------------------------------------------|------------------------------------------------------------------------------------------------------------------|--------------------------------------------------------------------------------------|
| Formula                                                                  | C <sub>4</sub> H <sub>18</sub> Cl <sub>3</sub> N <sub>3</sub> O                                                  | C <sub>4</sub> H <sub>14</sub> Cl <sub>3</sub> KN <sub>2</sub> O                     |
| <i>M<sub>w</sub></i>                                                     | 230.56                                                                                                           | 251.62                                                                               |
| <i>T</i> /K                                                              | 120(10)                                                                                                          | 120(10)                                                                              |
| Crystal system                                                           | orthorhombic                                                                                                     | orthorhombic                                                                         |
| Space group                                                              | Pbcm                                                                                                             | Pbcm                                                                                 |
| <i>a</i> (Å)                                                             | 6.4777(12)                                                                                                       | 6.4153(8)                                                                            |
| <i>b</i> (Å)                                                             | 12.8490(2)                                                                                                       | 12.7348(3)                                                                           |
| <i>c</i> (Å)                                                             | 12.7491(2)                                                                                                       | 12.7219(3)                                                                           |
| <i>V</i> (Å <sup>3</sup> )                                               | 1061.14(3)                                                                                                       | 1039.35(4)                                                                           |
| <i>Z</i>                                                                 | 4                                                                                                                | 4                                                                                    |
| Radiation                                                                | -                                                                                                                | Cu                                                                                   |
| 2θ range for data collection (°)                                         | -                                                                                                                | 13.804-146.174                                                                       |
| $\rho_{\text{calcd.}}$ / (g·cm <sup>-3</sup> )                           | -                                                                                                                | 1.608                                                                                |
| $\mu$ / mm <sup>-1</sup>                                                 | -                                                                                                                | 11.214                                                                               |
| <i>F</i> (000)                                                           | -                                                                                                                | 520.0                                                                                |
| <i>GOF</i>                                                               | -                                                                                                                | 1.205                                                                                |
| <i>R</i> <sub>1</sub> <sup>a</sup> [ <i>I</i> > 2 <i>s</i> ( <i>I</i> )] | -                                                                                                                | <i>R</i> <sub>1</sub> =0.0381, <i>wR</i> <sub>2</sub> =0.0960                        |
| <i>wR</i> <sub>2</sub> <sup>b</sup> (all data)                           | -                                                                                                                | <i>R</i> <sub>1</sub> =0.0384, <i>wR</i> <sub>2</sub> =0.0963                        |

*a*,  $R_1 = \sum||F_o| - |F_c|| / \sum|F_o|$ ; *b*,  $wR_2 = [\sum w(F_o^2 - F_c^2)^2 / \sum w(F_o^2)^2]^{1/2}$ .

<sup>#</sup>Note: These data are referenced from the reported data.<sup>1</sup>

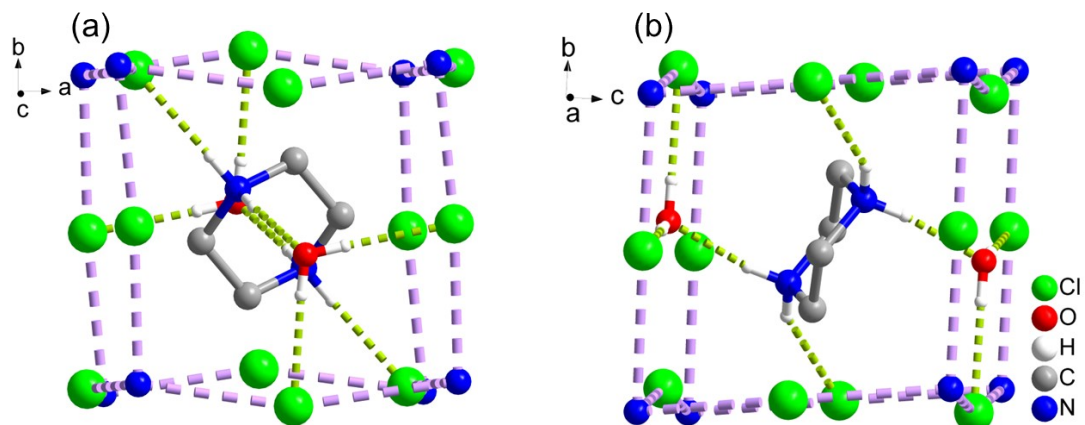

Figure S1. Hydrogen bond diagrams of  $[C_4H_{12}N_2][NH_4Cl_3] \cdot H_2O$ .

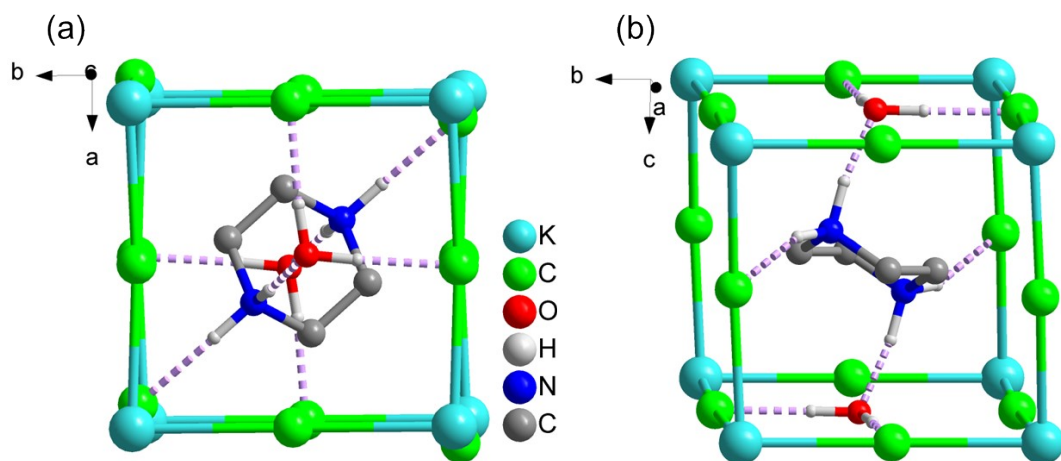

Figure S2. Hydrogen bond diagrams of  $[C_4H_{12}N_2][KCl_3] \cdot H_2O$ .

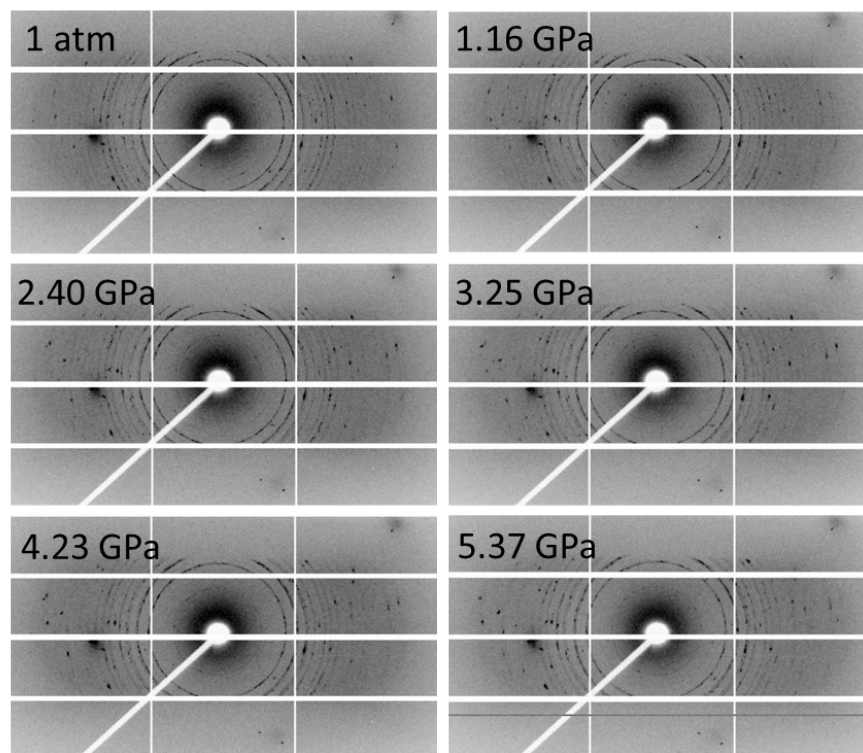

Figure S3. Representative 2D diffraction images at selected pressures of  $[\text{C}_4\text{H}_{12}\text{N}_2][\text{NH}_4\text{Cl}_3]\cdot\text{H}_2\text{O}$ .

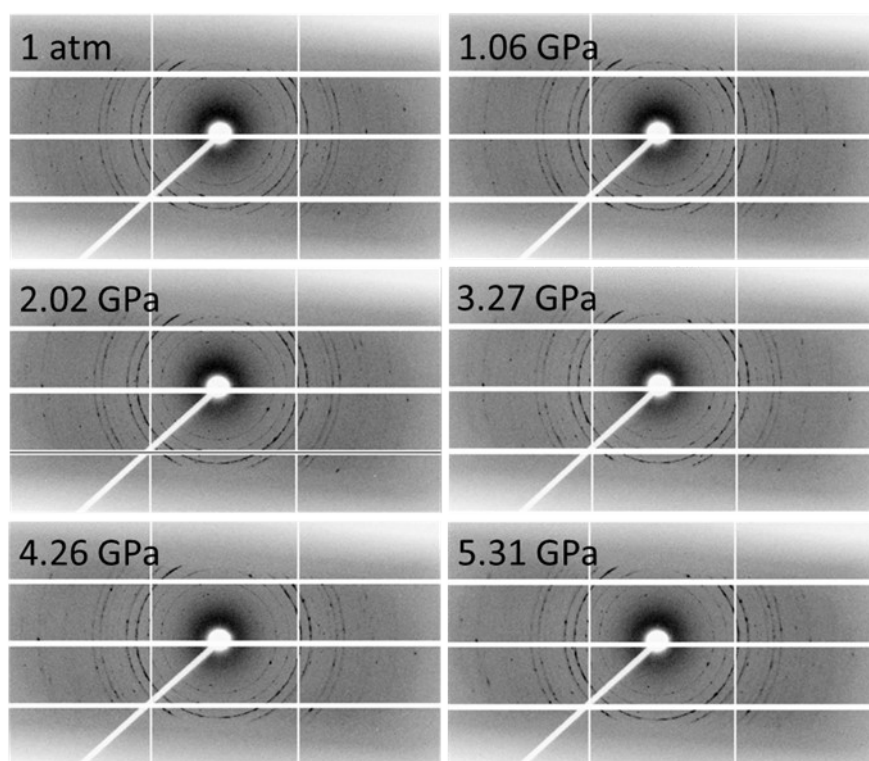

Figure S4. Representative 2D diffraction images at selected pressures of  $[\text{C}_4\text{H}_{12}\text{N}_2][\text{KCl}_3]\cdot\text{H}_2\text{O}$ .

## References:

1. Li, K.; Dong, L.-Y.; Xu, H.-X.; Qin, Y.; Li, Z.-G.; Azeem, M.; Li, W.; Bu, X.-H.,  
Electronic structures and elastic properties of a family of metal-free perovskites. *Mater.  
Chem. Front.* **2019**, 3 (8), 1678-1685.
